# Supplementary material for: Improvement of activated sludge dewatering properties using green conditioners: chitosan hydrochloride and lysozyme
Source: Royal Society of Chemistry journal article supplement (doi:10.1039/c8ra10349f), 2019-01-01
Supplement: c8ra10349f1.pdf [file c8ra10349f1.pdf]

## Supporting information

### **Improvement of activated sludge dewatering properties using green conditioners: chitosan hydrochloride and lysozyme**

Feng Lin, Xiaolin Zhu, Yong Luo, Peiran Yu, Mengru Liu\*

State Key Laboratory of Pulp and Paper Engineering, School of Light Industry and Engineering, South China University of Technology, Guangzhou 510640, China

1 \*Corresponding author. E-mail: lmr@scut.edu.cn (M. Liu)

2

**Table S1** Characteristics of the activated sludge

| Parameter           | Value                       |
|---------------------|-----------------------------|
| Water content (%)   | 97.3±0.3                    |
| pH                  | 6.6±0.2                     |
| SRF (m/kg)          | 10.04±0.12×10 <sup>12</sup> |
| CST (s)             | 47.3±2.1                    |
| Zeta potential (mV) | -14.3±0.3                   |
| Dv [50] (μm)        | 49.1±1.05                   |
| PN (mg/g DS)        | 3.15±0.05                   |
| PS (mg/g DS)        | 9.36±0.18                   |

3

4

5

**Table S2** Type and dosage level of the conditioners

| Dosage<br>Conditioner         | Level 1 | Level 2 | Level 3 | Level 4 | Level 5 | Level 6 | Level 7 |
|-------------------------------|---------|---------|---------|---------|---------|---------|---------|
| CPAM (mg/g DS)                | 0       | 1       | 1.5     | 2       | 2.5     | 3       | 4       |
| CTSCL (mg/g DS)               | 0       | 2.5     | 5       | 10      | 15      | 20      | 30      |
| LZM (×10 <sup>6</sup> U/g DS) | 0       | 1.6     | 2.4     | 3.2     | 4.8     | 6.4     | 8       |

6

---

8 **Text S1**

9 A volume of 100 mL sludge suspension was poured into the Buchner funnel, and a  
10 constant pressure of 0.1 MPa was applied by a vacuum pump. The volume of filtrate under  
11 pressure was continuously recorded every 10 s until the sludge surface cracked. The value of  
12 the SRF was calculated as follows:

$$r = \frac{2PA^2b}{\mu \omega}$$

13  
14 Where  $P$  (kg/m<sup>2</sup>) is the applied pressure,  $A$  (m<sup>2</sup>) is the filter area,  $\mu$  (kg\*s/m<sup>2</sup>) is the kinetic  
15 viscosity (KV),  $\omega$  (kg/m<sup>3</sup>) denotes the dry solid weight per unit volume sludge on the filtrate  
16 media, and  $b$  is the slope of the curve that is obtained by plotting the ratio of the time of filtration  
17 to the volume of filtrate ( $t/V$ ) versus the filtrate volume ( $V$ ).

18

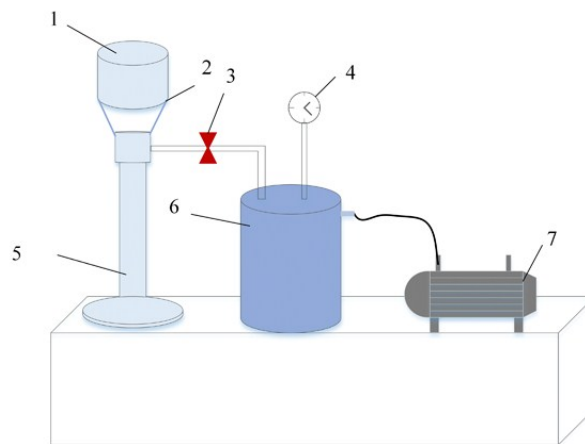

19

20 **Fig. S1** The experimental apparatus for SRF determination

21 (1) Buchner funnel; (2) filter paper; (3) control valve; (4) vacuum pressure gauge; (5)  
22 metering cylinder; (6) surge tank; (7) vacuum pump

---

23 **Text S2**

24 Firstly, 300 mL sludge sample was placed into centrifuge tubes, followed by 5 min  
25 centrifugation at 3000 rpm to discard the supernatant. Subsequently, the residual precipitate in  
26 the centrifugal tube was covered with the filtering cloth and transferred into the container  
27 before operating the pressure filtration system. The squeezing pressure was adjusted to  
28 approximately 5-6 MPa, and the filter-pressing time was controlled for 5 min. Finally, the water  
29 content of the dewatered sludge was examined by a Halogen Moisture Analyzer (HX204,  
30 Mettler Toledo, UK).

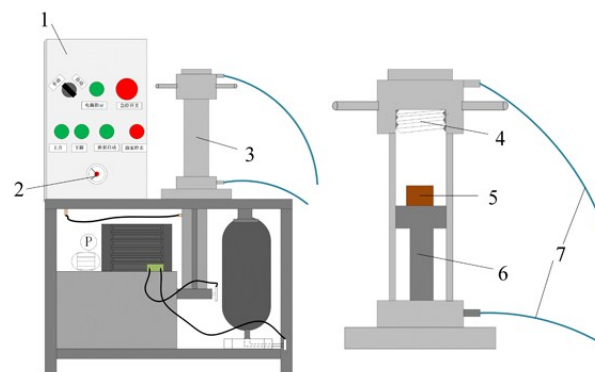

31

32 **Fig. S2** The lab-scale dewatering system

33 (1) control panel; (2) pressure controller; (3) sample room; (4) filter cloth; (5) sludge sample;  
34 (6) piston; (7) drainage exit

35 **Text S3**

36 Approximately 45 mL of the sludge suspension was placed in a 50 mL centrifuge tube  
37 and centrifuged at 3000 rpm for 15 min. Then, the supernatant was collected as S-EPS. The  
38 remaining deposit in the tube was then resuspended in a buffer solution, which was mixed with  
39 2 mmol  $\text{Na}_3\text{PO}_4$ , 4 mmol  $\text{NaH}_2\text{PO}_4$ , 9 mmol  $\text{NaCl}$  and 1 mmol  $\text{KCl}$ . The resulting mixture was  
40 centrifuged at 7400 rpm for 15 min to separate the solid and liquid phase. The collected organic  
41 matter was called the LB-EPS. Afterward, the residual sludge pellet in the centrifuge tube was  
42 suspended again in a buffer solution, sonicated for 5 min, then heated at 80°C for 30 min, and  
43 subsequently centrifuged to collect TB-EPS at 12000 rpm for 10 min. Finally, all the fractions

---

44 of the EPS were filtered through acetate cellulose membranes (0.22  $\mu\text{m}$ ) and subsequently  
45 analyzed.
